# Supplementary material for: Magnetic switching and quantization of bandgap in 2D graphene-like CrP3
Source: Royal Society of Chemistry journal article supplement (doi:10.1039/d5cp00188a), 2025-01-01
Supplement: d5cp00188a1.pdf [file d5cp00188a1.pdf]

## Supplementary Information

### **Magnetic switch and quantization of bandgap in 2D graphene-like CrP<sub>3</sub>**

Hong-yao Liu<sup>a, b</sup>, Mi He<sup>c</sup>, Huan Yang<sup>\* a</sup>, and Yujun Zheng<sup>\*a</sup>

<sup>a</sup>School of Physics, Shandong University, Jinan 250100, China

<sup>b</sup>School of Information and Electronic Engineering, Shandong Technology and  
Business University, Yantai 264005, China

<sup>c</sup>Shenzhen Jingtai Technology Co., Ltd. (XtalPi), Shenzhen 518045, China

\*E-mail: h.yang@sdu.edu.cn, yzheng@sdu.edu.cn

#### **List of Supplementary Figures**

Fig. S1 The phonon dispersion spectra of the p-CrP<sub>3</sub> and g-CrP<sub>3</sub>  
monolayers

Fig. S2 The formation energies in the convex hull diagram of the two  
types of CrP<sub>3</sub>

Fig. S3 The variation of MAE of g-CrP<sub>3</sub> monolayer with U value

Fig. S4 The band structure changes of g-CrP<sub>3</sub> under different strains

Fig. S5 The band structure changes of p-CrP<sub>3</sub> under different strains

Fig. S6 The band structure of g-CrP<sub>3</sub> by HSE06 functional

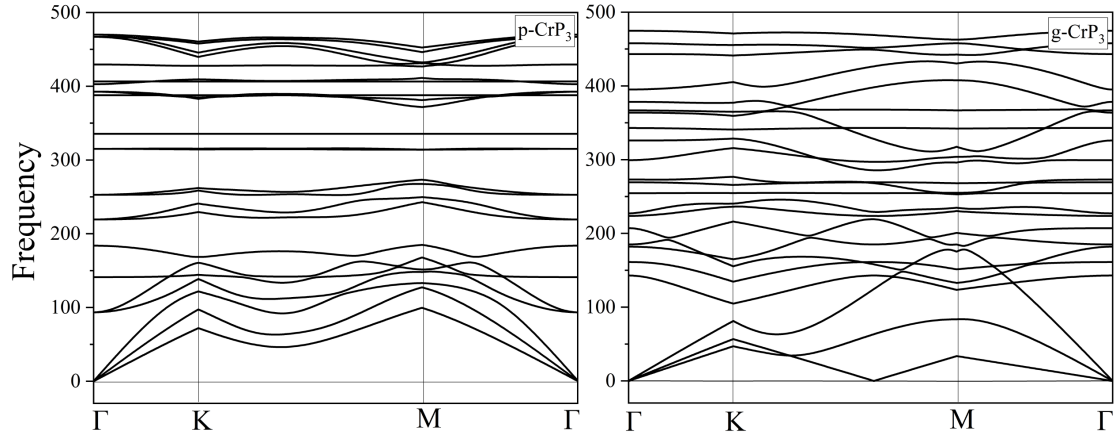

Fig. S1. The phonon dispersion spectra of the p-CrP<sub>3</sub> and g-CrP<sub>3</sub>.

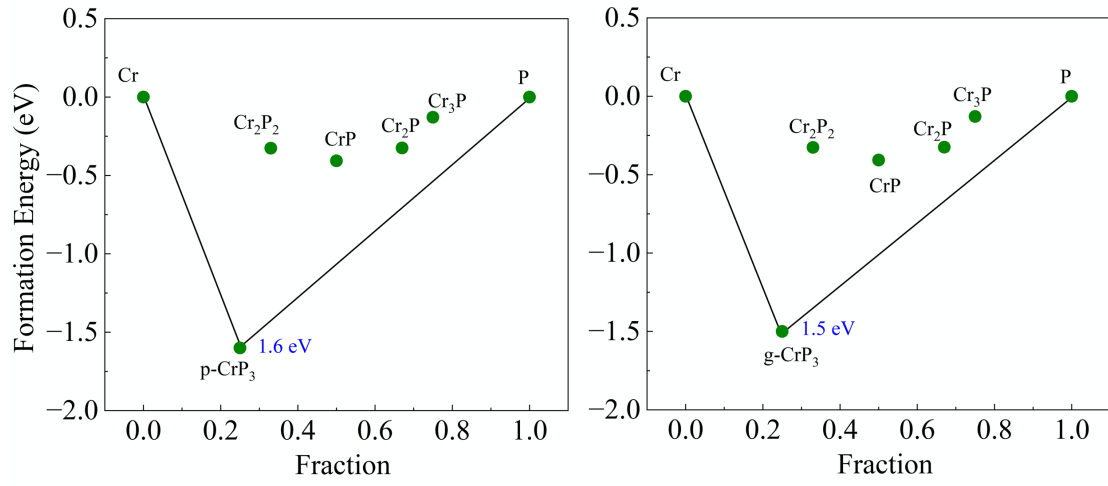

Fig. S2. The formation energies in the convex hull diagram of the two types of CrP<sub>3</sub>.

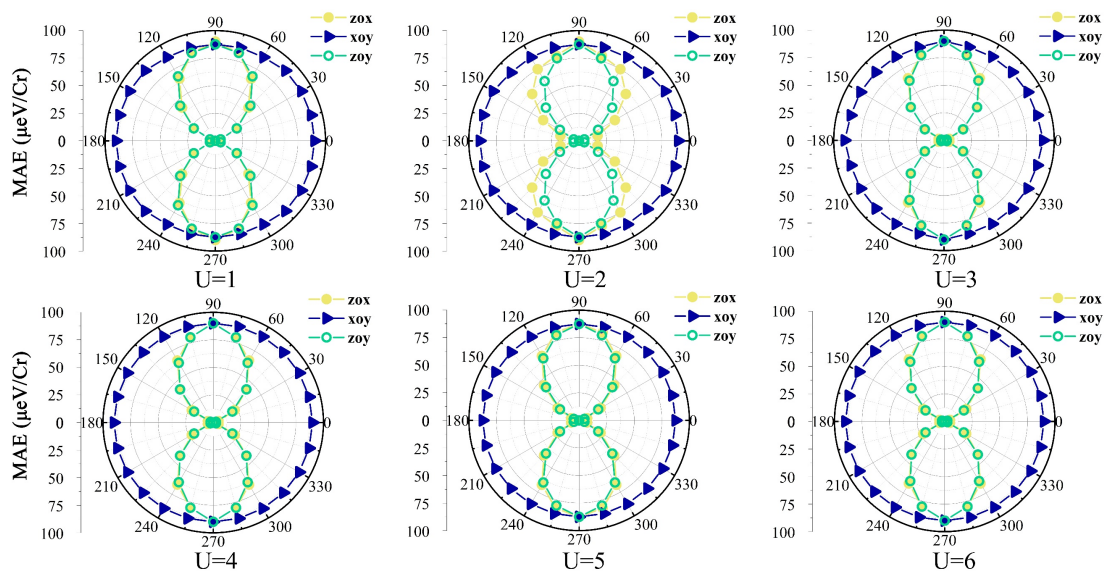

Fig. S3. The variation of MAE of g-CrP<sub>3</sub> monolayer with U value.

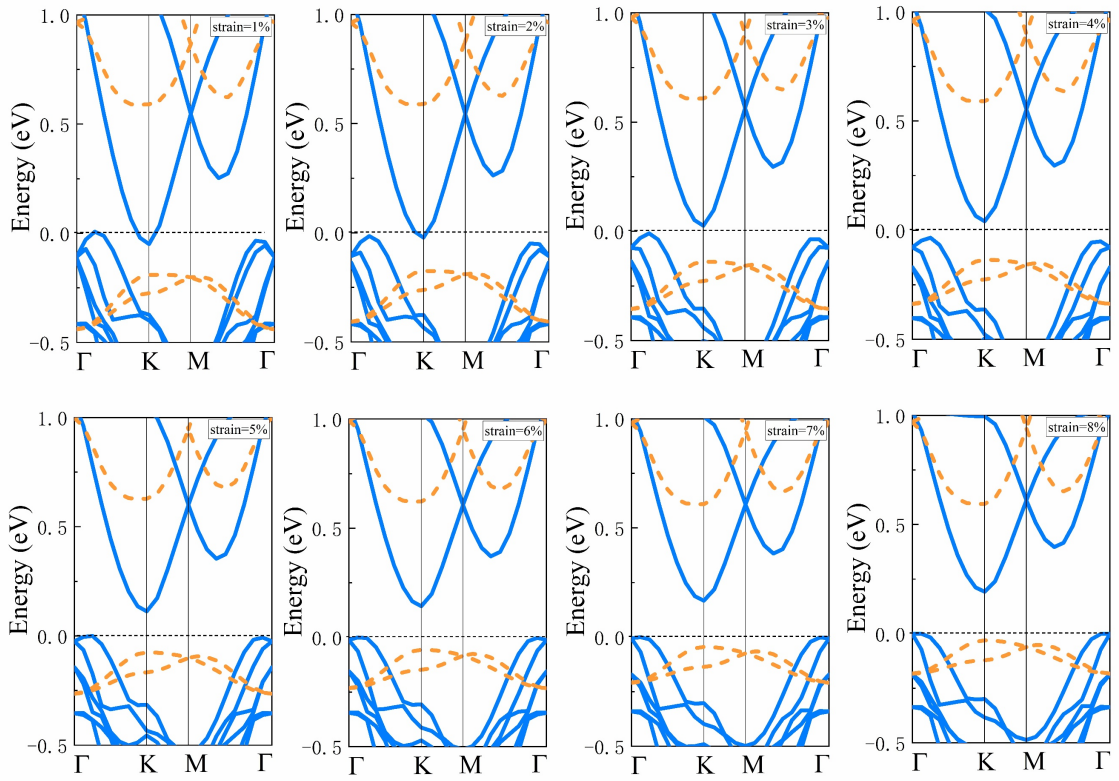

Fig. S4. The band structure changes of g-CrP<sub>3</sub> under different strains, where the blue solid line represents spin up and the orange dashed line represents spin down.

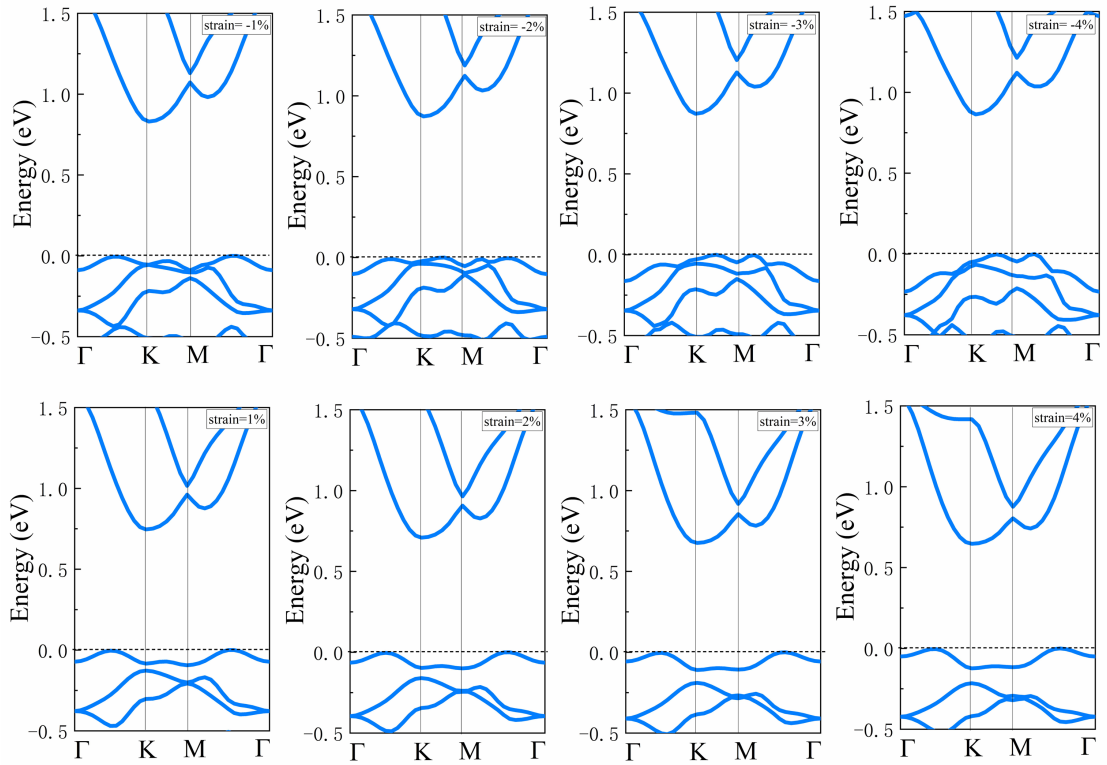

Fig. S5. The band structure changes of p-CrP<sub>3</sub> under different strains.

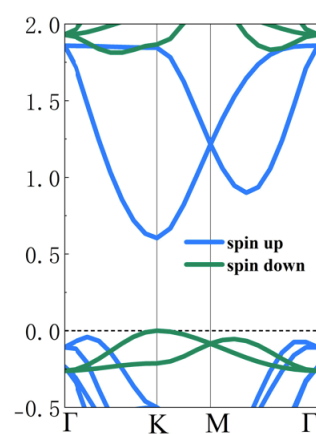

Fig. S6. The band structure of g-CrP3 by HSE06 functional.
